# Supplementary material
Source: publisher figshare collection journal article supplement (https://asha.figshare.com/articles/dataset/_/5404573)
Supplement: Supplementary file 2 [file 1]

## **Supplemental Material S1.** Experimental sentences.

### **Object Relative Sentences**

1. The snail that the crab had kissed outside the barn was noisy
2. The owl that the rat had pulled through the field was happy
3. The pig that the goat had chased over the fence was cheerful
4. The ape that the bear had pinched in the garden was worried
5. The fish that the snake had touched by the beach was angry
6. The frog that the hen had washed behind the barn was cheerful
7. The dog that the cow had tripped in the road was silly
8. The swan that the cat had pushed through the school was tired
9. The bird that the deer had bumped into the tree was hungry
10. The skunk that the fox had licked near the window was thirsty
11. The toad that the goose had bathed beside the house was little
12. The seal that the whale had splashed by the beach was friendly
13. The dove that the hawk had hugged beside the school was dirty
14. The duck that the sheep had scratched by the window was lazy
15. The horse that the mule had grabbed near the lake was sleepy
16. The crab that the snail had washed by the river was hungry
17. The rat that the owl had scratched by the lake was thirsty
18. The goat that the pig had bumped under the stairs was noisy
19. The bear that the ape had squeezed in the garden was friendly
20. The fox that the skunk had grabbed near the pond was dirty
21. The hen that the frog had tripped down the stairs was lazy
22. The cow that the dog had squeezed near the house was little
23. The cat that the swan had bathed below the nest was tired
24. The deer that the bird had touched in the field was cheerful

25. The snake that the fish had chased around the pond was silly
26. The goose that the toad had splashed near the river was angry
27. The whale that the seal had licked under the tree was worried
28. The hawk that the dove had kissed inside the nest was cheerful
29. The sheep that the duck had pushed over the fence was happy
30. The mule that the horse had pulled down the road was sleepy

### **Subject Relative (Filler) Sentences**

1. The rat that had pinched the skunk in the field was angry
2. The cat that had pulled the fox through the field was happy
3. The duck that had washed the goat by the river was cheerful
4. The bear that had pinched the ape under the stairs was little
5. The fish that had touched the snail beside the house was angry
6. The hawk that had chased the hen around the pond was cheerful
7. The horse that had splashed the cow by the beach was sleepy
8. The swan that had scratched the owl by the lake was tired
9. The dog that had pushed the deer over the fence was worried
10. The skunk that had grabbed the rat in the garden was friendly
11. The toad that had squeezed the crab near the house was lazy
12. The seal that had licked the whale near the window was thirsty
13. The frog that had bathed the bird inside the nest was dirty
14. The pig that had bumped the sheep into the tree was hungry
15. The dove that had tripped the hawk in the road was hungry
16. The goose that had washed the snake behind the barn was silly
17. The fox that had scratched the cat by the window was sleepy
18. The goat that had bathed the duck behind the tree was cheerful

19. The ape that had chased the bear over the fence was noisy
20. The snake that had watched the goose outside the barn was noisy
21. The hen that had bumped the dove near the pond was lazy
22. The mule that had squeezed the dog in the garden was silly
23. The owl that had hugged the swan beside the school was worried
24. The deer that had tripped the mule down the stairs was dirty
25. The snail that had splashed the fish near the river was happy
26. The crab that had grabbed the toad near the lake was tired
27. The whale that had touched the seal by the beach was thirsty
28. The bird that had watched the frog below the nest was cheerful
29. The sheep that had pulled the pig down the road was friendly
30. The cow that had pushed the horse around the school was little
